# Supplementary material for: A pyrazinium-based fluorescent chemosensor for the selective detection of 2,4,6-trinitrophenol in an aqueous medium
Source: Royal Society of Chemistry journal article supplement (doi:10.1039/d2nj02999e), 2022-01-01
Supplement: d2nj02999e1.pdf [file d2nj02999e1.pdf]

Electronic Supporting Information (ESI) for

**Pyrazinium-based Fluorescent Chemosensor for Selective Detection of 2,4,6-trinitrophenol in Aqueous Medium**

Pragya,<sup>a</sup> Vaishali Saini,<sup>a</sup> Krishnan Rangan,<sup>b</sup> Bharti Khungar<sup>a\*</sup>

<sup>a</sup>Department of Chemistry, Birla Institute of Technology and Science Pilani, Pilani Campus, Pilani, Rajasthan, 333031, India

<sup>b</sup>Department of Chemistry, Birla Institute of Technology and Science Pilani, Hyderabad Campus, Secunderabad, Telangana, 500078, India

*E-mail address:* [bkhungar@pilani.bits-pilani.ac.in](mailto:bkhungar@pilani.bits-pilani.ac.in)

**Table of contents**

Fig. S1. <sup>1</sup>H NMR of **TPyz**

Fig. S2. <sup>13</sup>C NMR of **TPyz**

Fig. S3. HRMS of **TPyz**

Fig. S4. <sup>1</sup>H NMR of **BTPyz**

Fig. S5. <sup>13</sup>C NMR of **BTPyz**

Fig. S6. HRMS of **BTPyz**

Fig. S7. UV-vis and fluorescence spectra of **BTPyz**

Fig. S8. Absorbance and fluorescence response of **BTPyz** towards TNP in different solvents

Fig. S9. Fluorescence quenching percentage of *p*-cresol, 4-NP, 2,4-DNP and TNP

Fig. S10. Selectivity of **BTPyz** towards TNP in the presence of anions, cations, and organic analytes

Fig. S11. Effect of pH on fluorescence intensity

Fig. S12. Stern–Volmer plot of **BTPyz** using TNP as a quencher

Fig. S13. Spectral overlap between the normalized emission spectrum of **BTPyz** and normalized absorption spectra of different analytes

Fig. S14. Fluorescence lifetime decay curves of **BTPyz** and **BTPyz**-TNP

Fig. S15. Emission intensity of **BTPyz** observed and after inner filter effect corrections

Fig. S16. Fluorescence spectra of **BTPyz** and **BTPyz** with TFA

Fig. S17. <sup>1</sup>H NMR of **BTPyz**-TNP complex

Fig. S18. HRMS of **BTPyz**-TNP complex

Fig. S19. HOMO-LUMO energy levels of **BTPyz** and organic analytes

Fig. S20. Fluorescence quenching of TNP in soil samples

### List of tables

Table S1 A comparison of literature reported Chemosensors for TNP detection

Table S2 Calculations of inner filter effect corrections for quenching of **BTPyz** by TNP

Table S3 Single-crystal XRD data and structure refinement of **BTPyz** and **BTPyz**-TNP complex

Table S4 Bond Lengths of **BTPyz**

Table S5 Bond Angles of **BTPyz**

Table S6 Bond Lengths of **BTPyz**-TNP complex

Table S7 Bond Angles of **BTPyz**-TNP complex

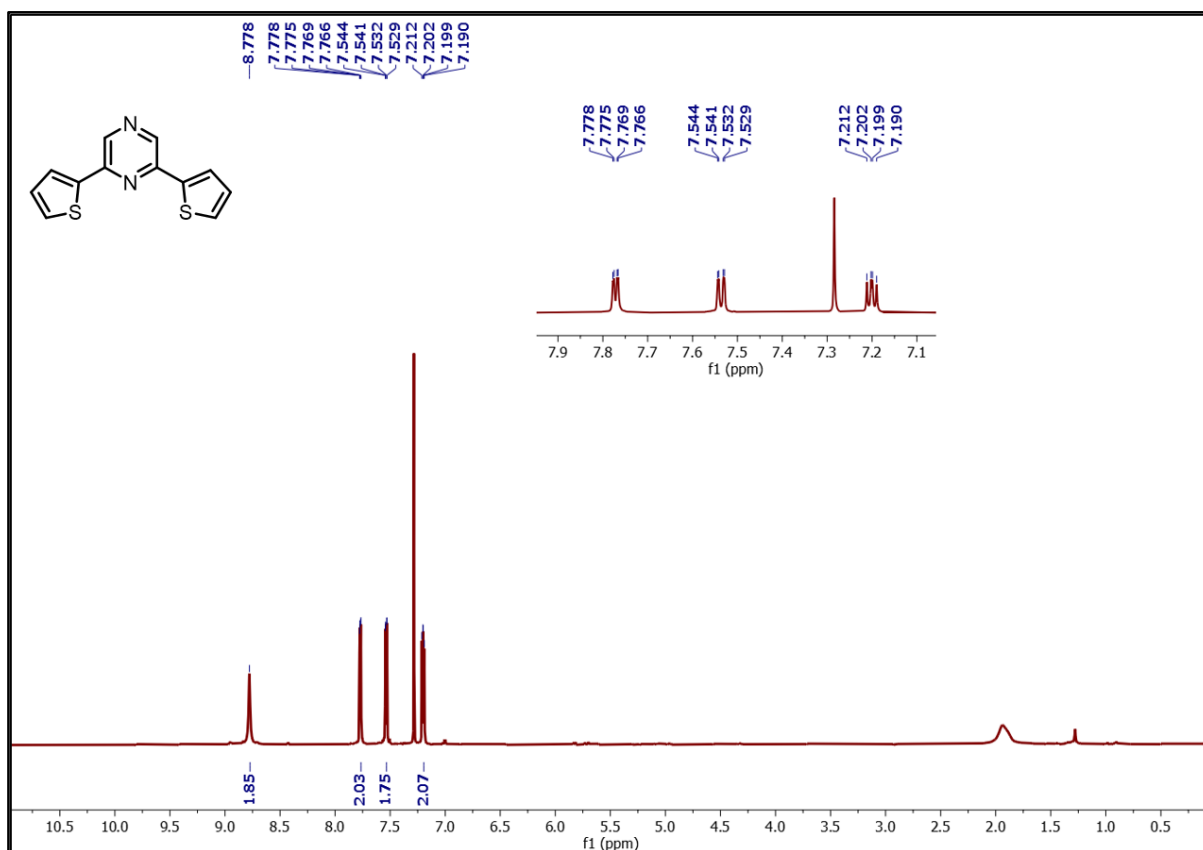

Fig. S1 <sup>1</sup>H NMR of TPyz

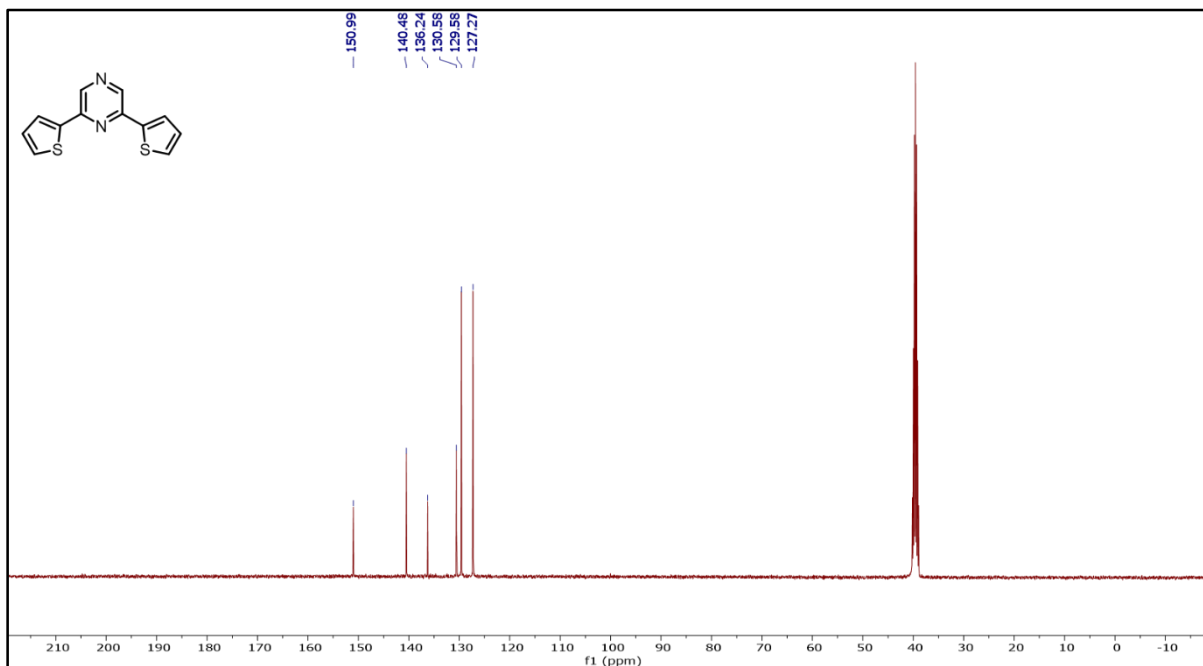

**Fig. S2**  $^{13}\text{C}$  NMR of TPyz

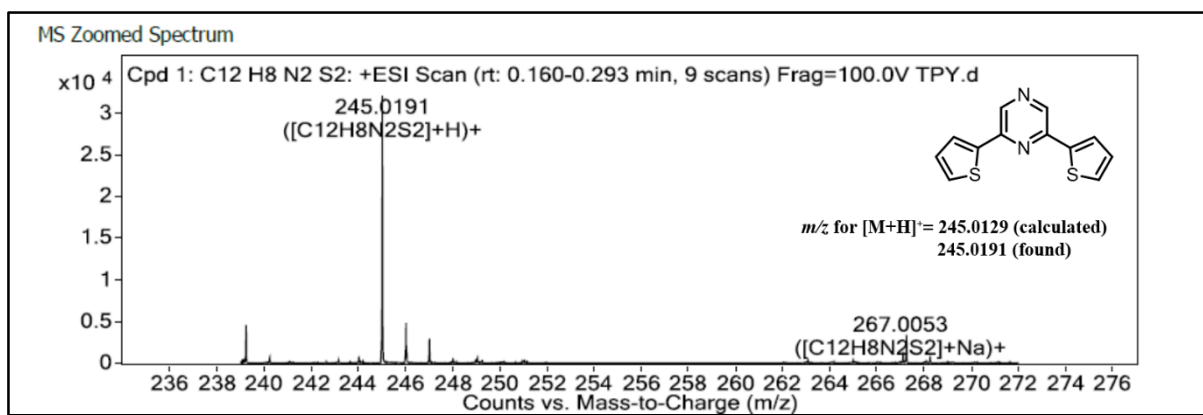

**Fig. S3** HRMS of TPyz

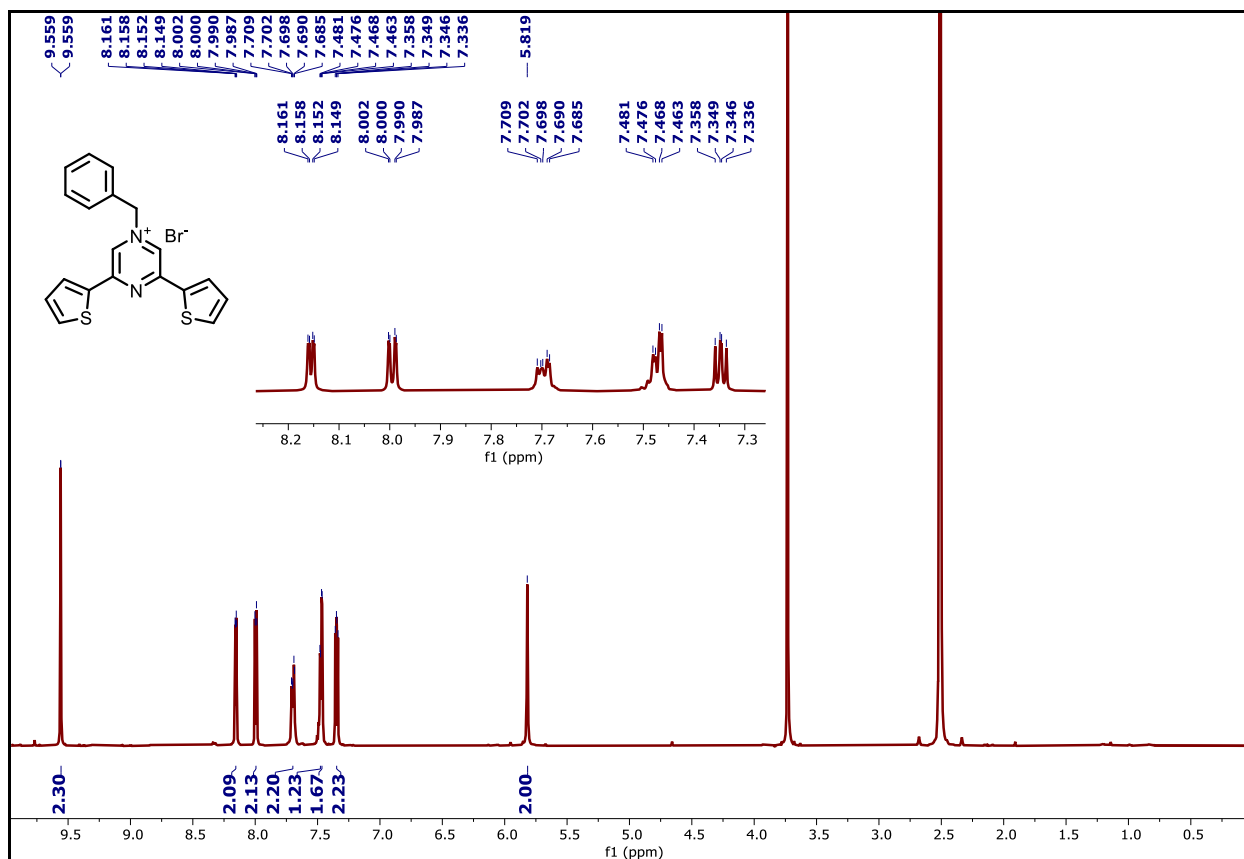

Fig. S4  $^1\text{H}$  NMR of BTPyz

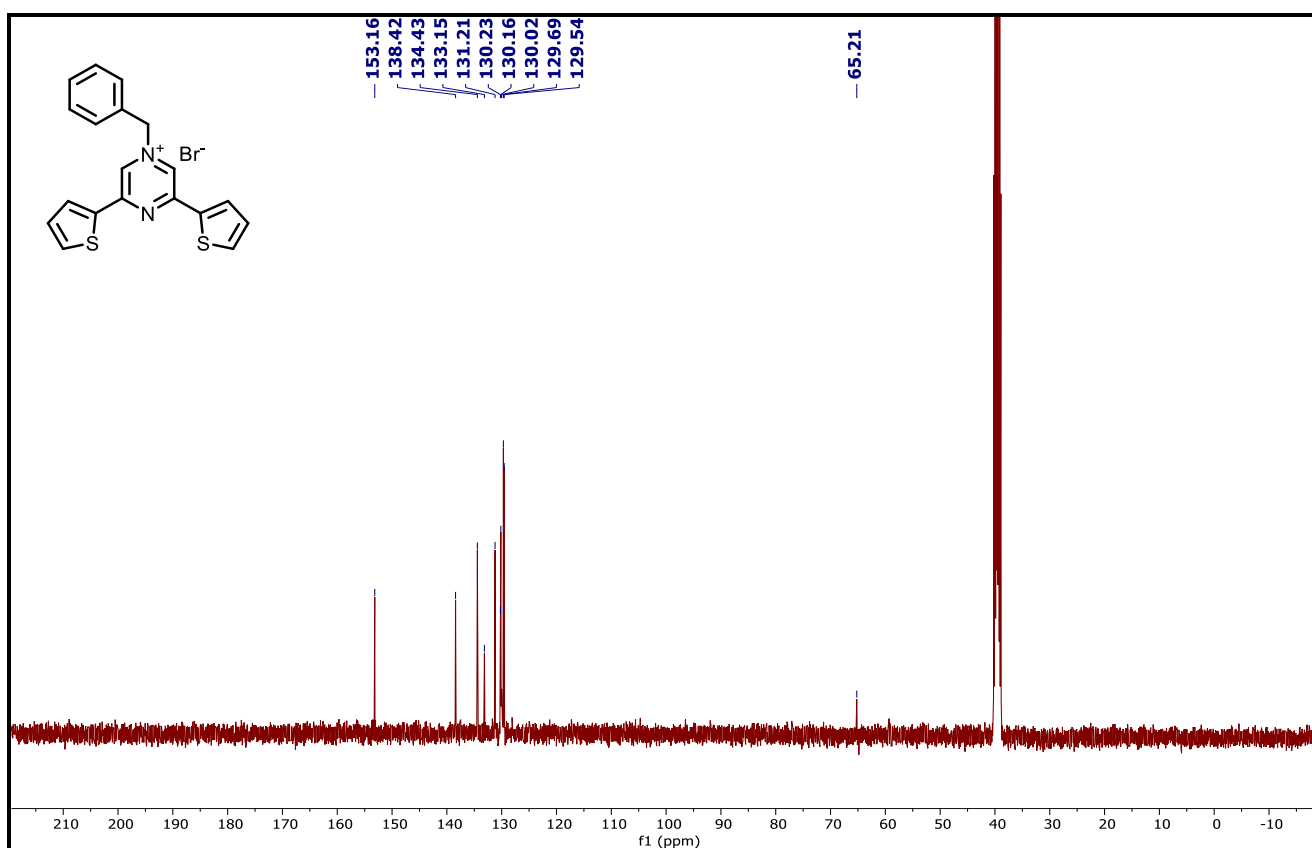

Fig. S5  $^{13}\text{C}$  NMR of BTPyz

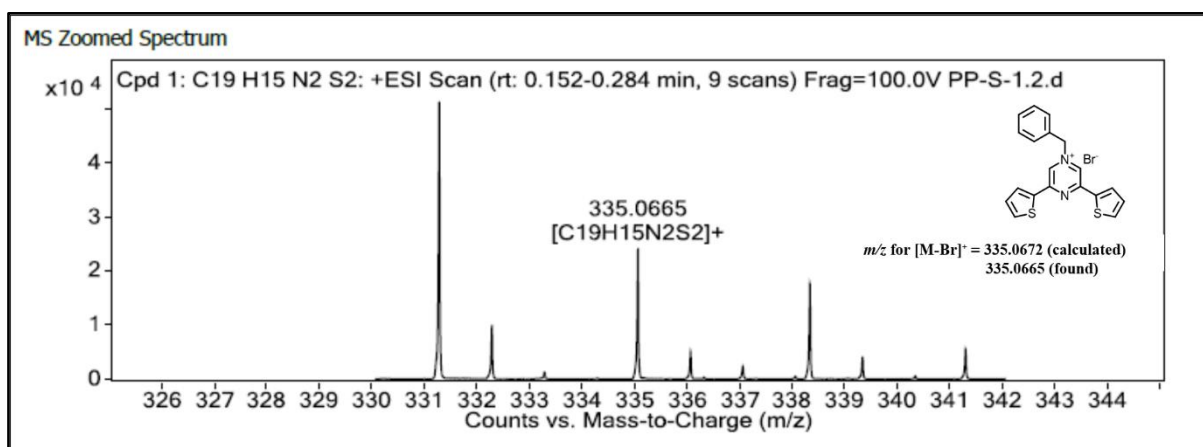

**Fig. S6** HRMS of **BTPyz**

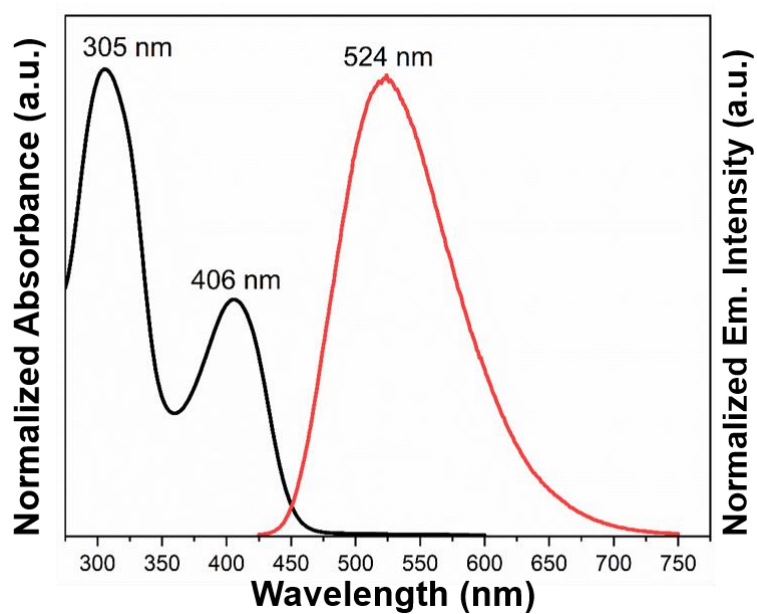

**Fig. S7** UV-vis and fluorescence spectra of **BTPyz**

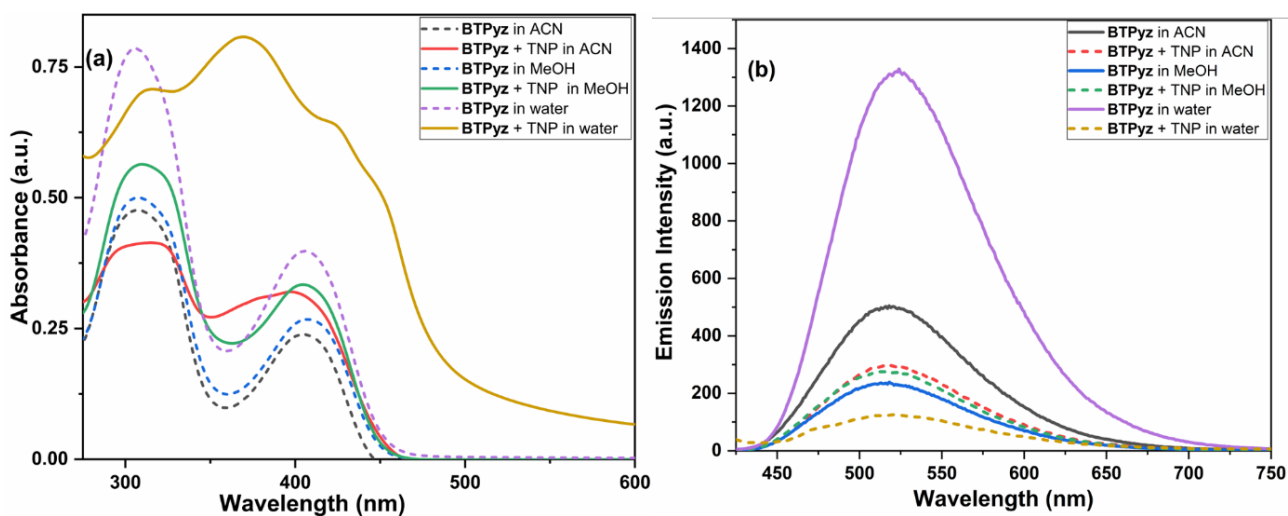

**Fig. S8** (a) Absorbance (b) Fluorescence response of **BTPyz** towards TNP in different solvents

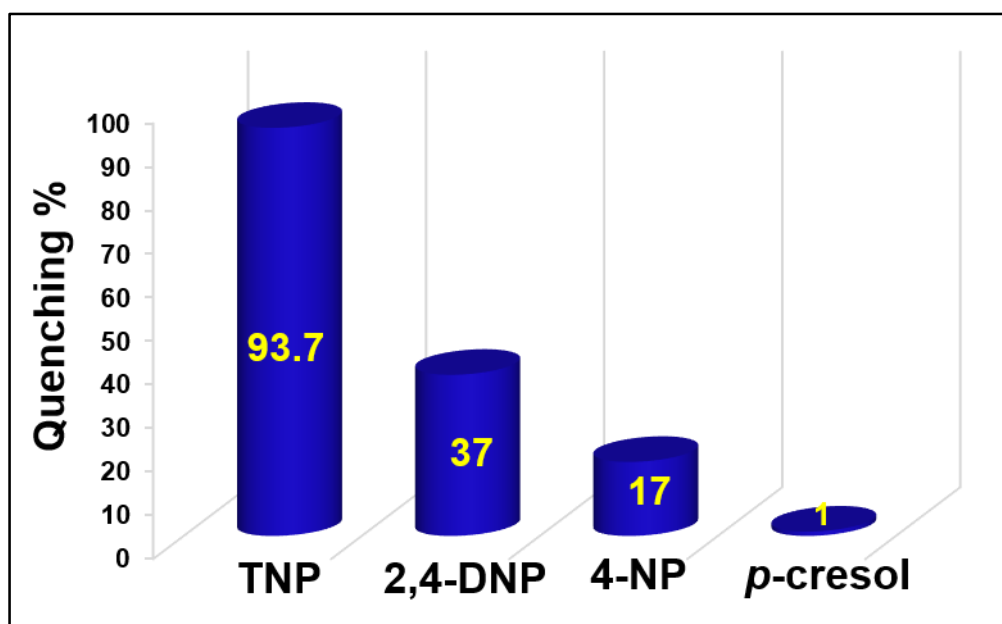

**Fig. S9** Fluorescence quenching percentage of *p*-cresol, 4-NP, 2,4-DNP and TNP

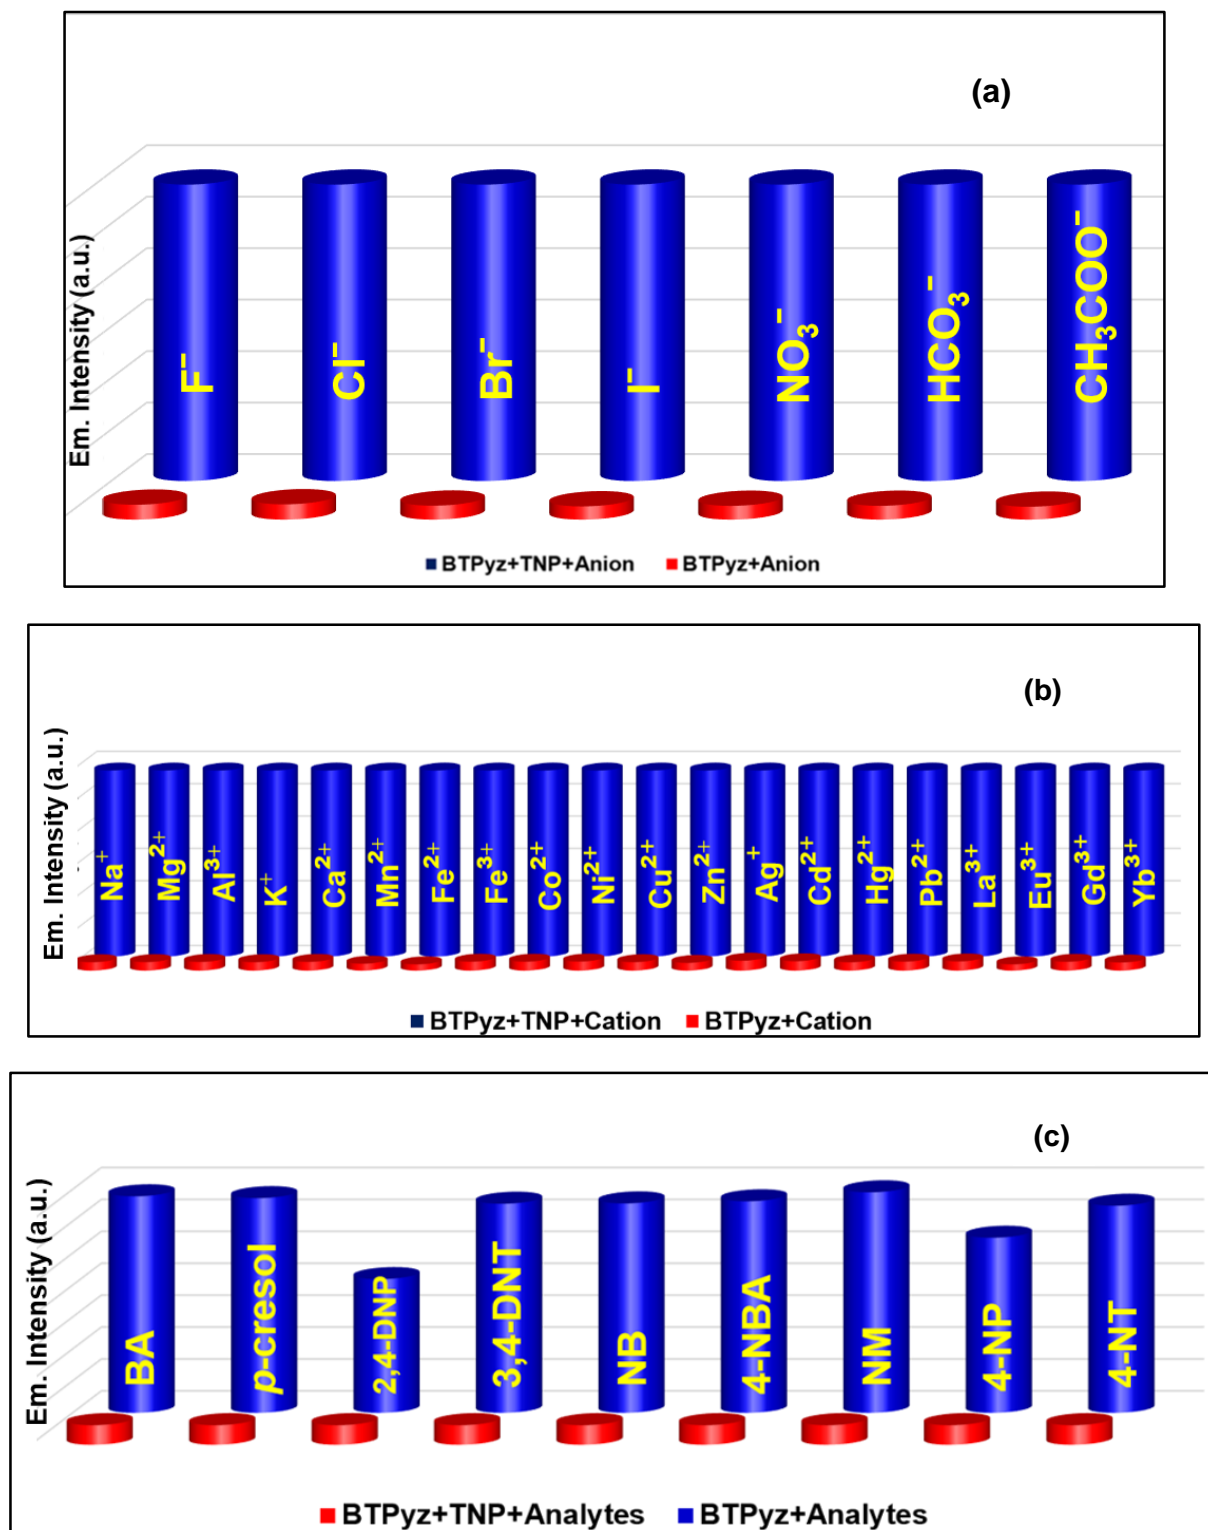

**Fig. S10** Selectivity of **BTPyz** towards TNP in the presence of (a) anions, (b) cations, and (c) organic analytes

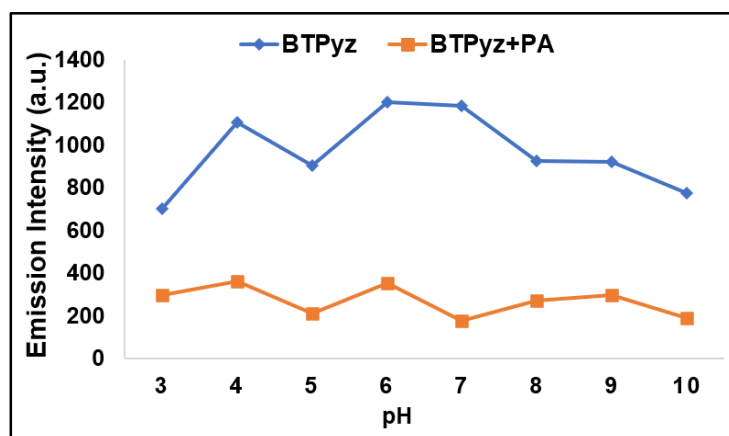

**Fig. S11** Effect of pH on fluorescence intensity

## Methods

### Photophysical studies

For photophysical studies, 10 mM stock solutions of **BTPyz** and different analytes (cations, anions and organic analytes) were prepared in Milli-Q water. The stock solutions of 4-nitrotoluene (NT), 3,4-dinitrotoluene (3,4-DNT), and 4-nitrobenzoic acid (NBA) were prepared in UV grade THF.

### Quantum yield calculation<sup>1</sup>

The fluorescence quantum yield was executed using quinine sulfate as a reference in 0.1 M H<sub>2</sub>SO<sub>4</sub> ( $\Phi_R = 0.54$ ) and calculated using the following equation

$$\Phi_S = \Phi_R \frac{I_S}{I_R} \times \frac{A_R}{A_S} \times \frac{\eta_S^2}{\eta_R^2}$$

Where I = integrated area under the fluorescence curve, A = absorbance at the excitation wavelength,  $\eta$  = refractive index of the medium and  $\Phi$  = fluorescence quantum yield. Subscripts S and R refer to the sample and the reference standard, respectively.

### Fluorescence quenching percentage calculation<sup>2</sup>

The fluorescence quenching percentage was calculated using the equation

$$\text{Fluorescence quenching \%} = \left(1 - \frac{I}{I_0}\right) \times 100\%$$

Where  $I_0$  = initial fluorescence intensity in the absence of analyte, I = fluorescence intensity in the presence of analyte.



### Overlap Integral Calculations<sup>3</sup>

Analytes Overlap integral values were calculated using the equation

$$J(\lambda) = F_D(\lambda)\varepsilon_A(\lambda)\lambda^4d\lambda$$

Where  $F_D(\lambda)$  represents the corrected fluorescence intensity of donor in the range of  $\lambda$  to  $\lambda + \Delta\lambda$  with the total intensity normalized to unity.  $\varepsilon_A$  is the molar absorptivity of the acceptor at  $\lambda$  in  $M^{-1} cm^{-1}$ .

The Förster distance  $R_0$  was calculated for **BTPyz**-TNP interaction using the equation

$$R_0 = 0.211 [(J)Q(\eta^{-4})(\kappa^2)]^{1/6}$$

Where  $J$  is the degree of spectral overlap between the donor fluorescence spectrum and the acceptor absorption spectrum.  $Q = 0.30$ ; fluorescence quantum yield of the donor (without acceptor).  $\eta$  is the refractive index of the medium,  $\kappa^2$  (dipole orientation factor) = 0.667.

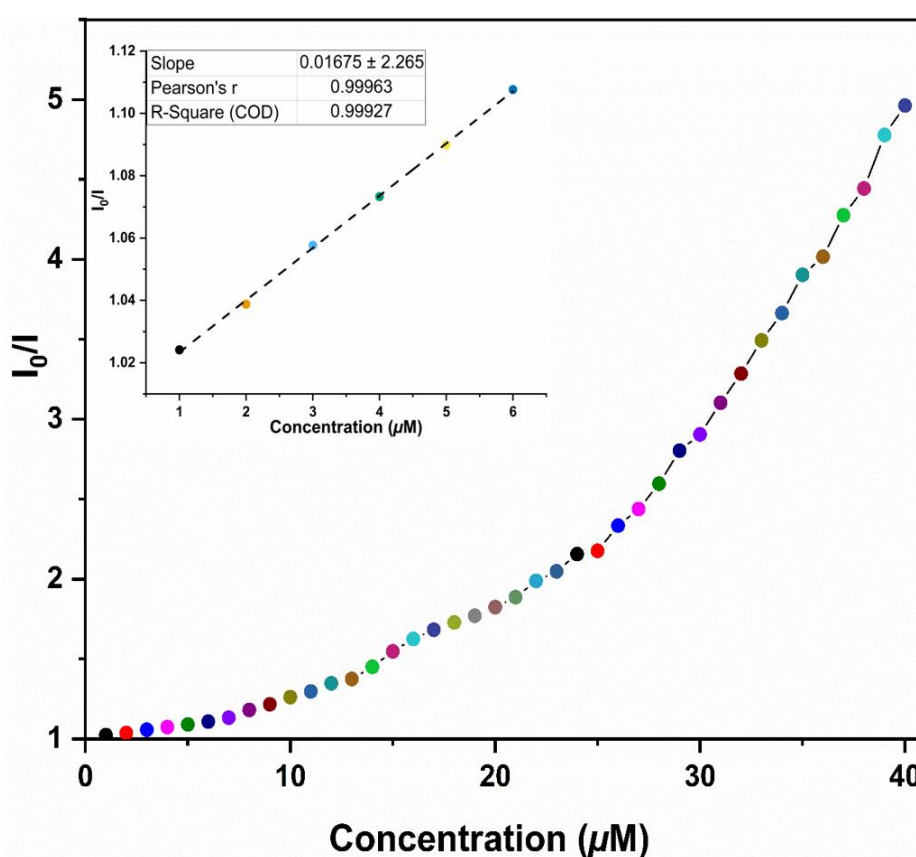

**Fig. S12** Stern–Volmer plot of **BTPyz** using TNP as a quencher

**Table S1:** A comparison of literature reported Chemosensors for TNP detection

| S. No. | Publication                                                                                                                                                 | Material used       | Detection Limit      | Stern-Volmer constant                                               | Medium used         |
|--------|-------------------------------------------------------------------------------------------------------------------------------------------------------------|---------------------|----------------------|---------------------------------------------------------------------|---------------------|
| 1      | Present Study                                                                                                                                               | Pyrazinium-based    | 11.6 nM              | $3.8 \times 10^4 \text{ M}^{-1}$                                    | Aqueous medium      |
| 2      | H. M. Junaid, M. T. Waseem, Z. A. Khan, H. Gul, C. Yu, A. J. Shaikh and S. A. Shahzad, <i>J. Photochem. Photobiol. A: Chem.</i> , 2022, <b>428</b> , 113865 | Fluorene-based      | 0.5 nM               | –                                                                   | Aqueous medium      |
| 3      | H. Muniyasamy, C. Chinnadurai, M. Nelson, A. Veeramanoharan, M. Sepperumal and S. Ayyanar, <i>Ind. Eng. Chem. Res.</i> , 2021, <b>60</b> , 7987–7997        | Triazine derivative | 209 nM               | 1.02 mM,                                                            | Aqueous medium      |
| 4      | C. Gogoi, H. Reinsch and S. Biswas, <i>CrystEngComm</i> , 2019, <b>21</b> , 6252–6260.                                                                      | Organic framework   | 13.08 ppb            | $4.56 \times 10^5 \text{ M}^{-1}$                                   | Aqueous medium      |
| 5      | N. Tripathi, P. Singh and S. Kumar, <i>New J. Chem.</i> , 2017, <b>41</b> , 8739–8747                                                                       | Pyridinium-based    | $10^{-13} \text{ M}$ | $6.73 \times 10^8 \text{ M}^{-1}$                                   | Aqueous media       |
| 6      | A. S. Tanwar and P. K. Iyer, <i>ACS Omega</i> , 2017, <b>2</b> , 4424–4430                                                                                  | Pyridinium-based    | 295 nM               | –                                                                   | HEPES Buffer (pH-7) |
| 7      | S. Kumari, S. Joshi, T. C. Cordova-Sintjago, D. D. Pant and R. Sakhuja, <i>Sens. Actuators B Chem.</i> , 2016, <b>229</b> , 599–608                         | Imidazolium-based   | 107 nM and 87 nM     | $5 \times 10^4 \text{ M}^{-1}$ and $2.2 \times 10^4 \text{ M}^{-1}$ | Aqueous media       |
| 8      | A. Kumar, A. Pandith and H. S. Kim, <i>Sens. Actuators B Chem.</i> , 2016, <b>231</b> , 293–301                                                             | Imidazolium-based   | 10 nM                | $1.01 \times 10^6 \text{ M}^{-1}$                                   | Aqueous medium      |

|    |                                                                                                                                    |                              |                               |                                   |                        |
|----|------------------------------------------------------------------------------------------------------------------------------------|------------------------------|-------------------------------|-----------------------------------|------------------------|
| 9  | A. H. Malik, S. Hussain, A. Kalita and P. K. Iyer, <i>ACS Appl. Mater. Interfaces</i> , 2015, <b>7</b> , 26968–26976.              | Imidazolium-based            | 7.07 ppt                      | $1.12 \times 10^8 \text{ M}^{-1}$ | Aqueous media          |
| 10 | S. Hussain, A. H. Malik, M. A. Afroz and P. K. Iyer, <i>Chem. Commun.</i> , 2015, <b>51</b> , 7207–7210                            | Imidazolium-based            | 128 ppt                       | $0.1 \times 10^8 \text{ M}^{-1}$  | Aqueous media          |
| 11 | S. Sandhu, R. Kumar, P. Singh, A. Mahajan, M. Kaur and S. Kumar, <i>ACS Appl. Mater. Interfaces</i> , 2015, <b>7</b> , 10491–10500 | Benzimidazolium-based        | $5 \times 10^{-13} \text{ M}$ | $4.8 \times 10^5 \text{ M}^{-1}$  | H <sub>2</sub> O: DMSO |
| 12 | S. Pramanik, V. Bhalla and M. Kumar, <i>Anal. Chim. Acta</i> , 2013, <b>793</b> , 99–106                                           | Hexaphenylbenzene derivative | 6.87 ppb                      | $1.92 \times 10^5 \text{ M}^{-1}$ | Aqueous medium         |

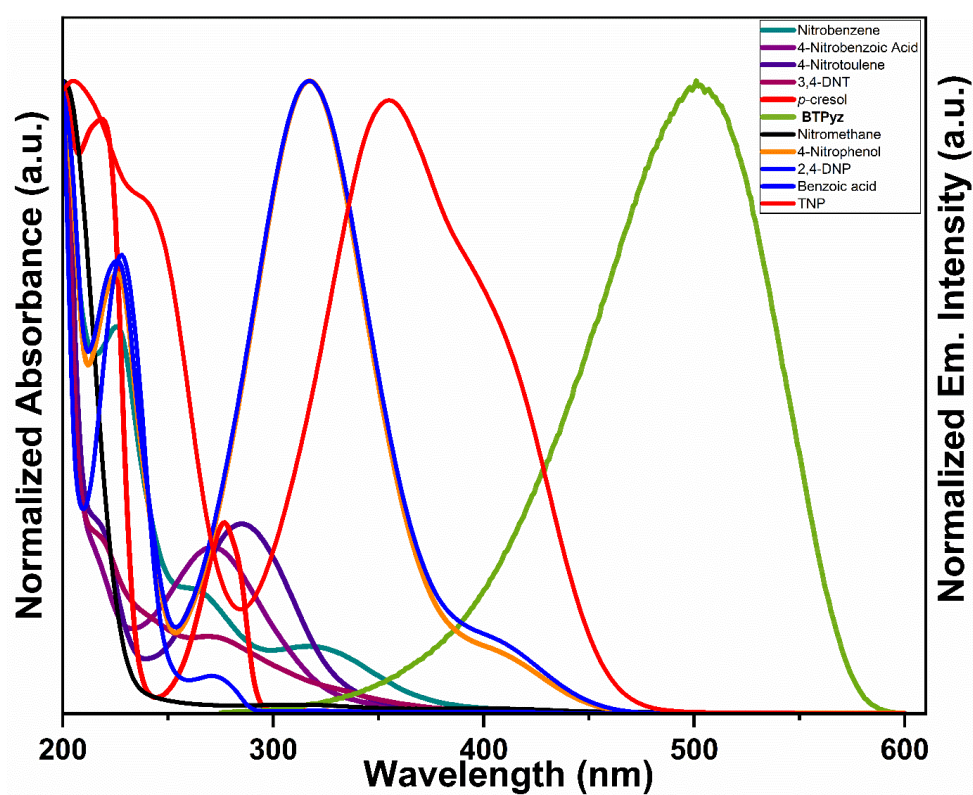

**Fig. S13** Spectral overlap between the normalized emission spectrum of **BTPyz** and normalized absorption spectra of different analytes

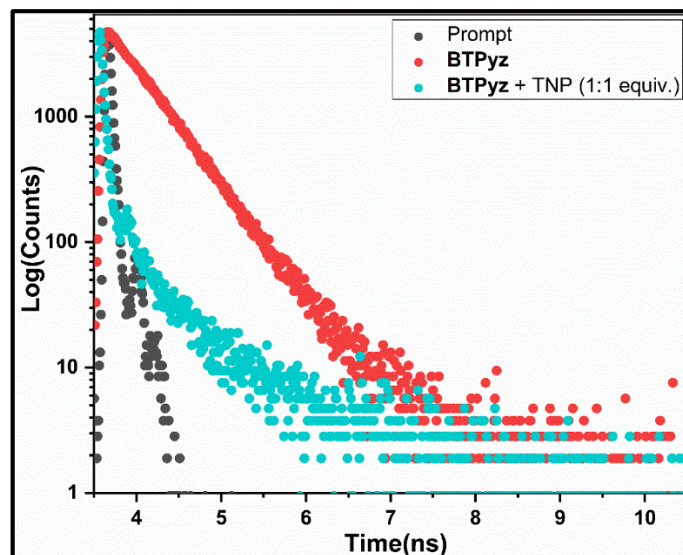

**Fig. S14** Fluorescence lifetime decay curves of **BTPyz** and **BTPyz-TNP**

**Table S4** Calculations of inner filter effect corrections for quenching of **BTPyz** by TNP

| TNP [ $\mu\text{M}$ ] | $A_{\text{em}}$ | $A_{\text{ex}}$ | $I_{\text{obs}}$ | $I_{\text{corr}}$ | $I_{\text{corr}}/I_{\text{obs}}$ | $I_{\text{corr}}/I_{\text{obs},0}$ |
|-----------------------|-----------------|-----------------|------------------|-------------------|----------------------------------|------------------------------------|
| 0                     | 0.000152        | 0.01867         | 1080000          | 1104967           | 1.021906                         | 0                                  |
| 5                     | 0.000426        | 0.02137         | 1000000          | 1028167           | 1.024959                         | 0.93049                            |
| 10                    | 0.000211        | 0.02499         | 884830           | 910878.6          | 1.029439                         | 0.82434                            |
| 15                    | 0.00157         | 0.02871         | 742340           | 768675.2          | 1.035476                         | 0.69565                            |
| 20                    | 0.00252         | 0.03054         | 608020           | 631608.4          | 1.038795                         | 0.57160                            |
| 25                    | 0.00395         | 0.03063         | 499450           | 519735.1          | 1.040615                         | 0.47036                            |
| 30                    | 0.00573         | 0.03168         | 384120           | 401025.4          | 1.044011                         | 0.36292                            |
| 35                    | 0.00688         | 0.03224         | 293830           | 307366.2          | 1.046068                         | 0.27816                            |
| 40                    | 0.00755         | 0.03474         | 225310           | 236551.4          | 1.049893                         | 0.21407                            |
| 45                    | 0.00786         | 0.03685         | 169340           | 178284.9          | 1.052822                         | 0.16134                            |
| 50                    | 0.00761         | 0.0395          | 128660           | 135830.9          | 1.055735                         | 0.12292                            |

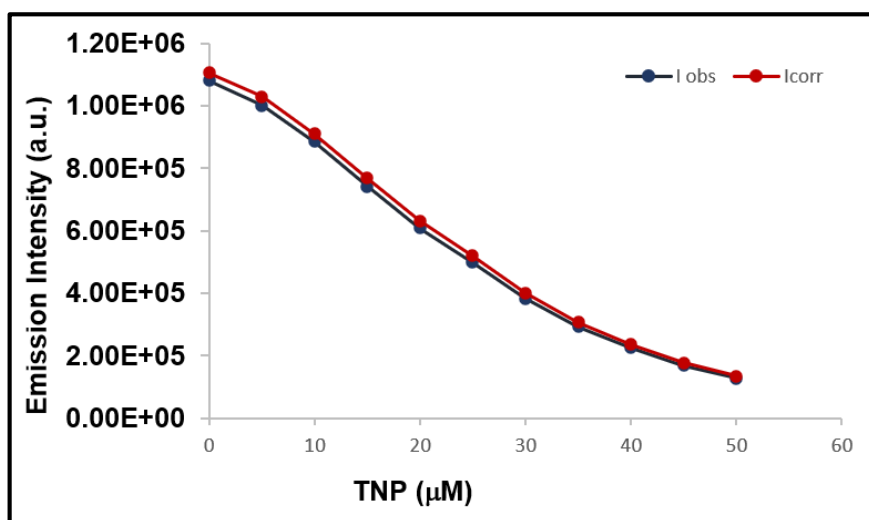

**Fig. S15** Emission intensity of **BTPyz** observed and after inner filter effect corrections

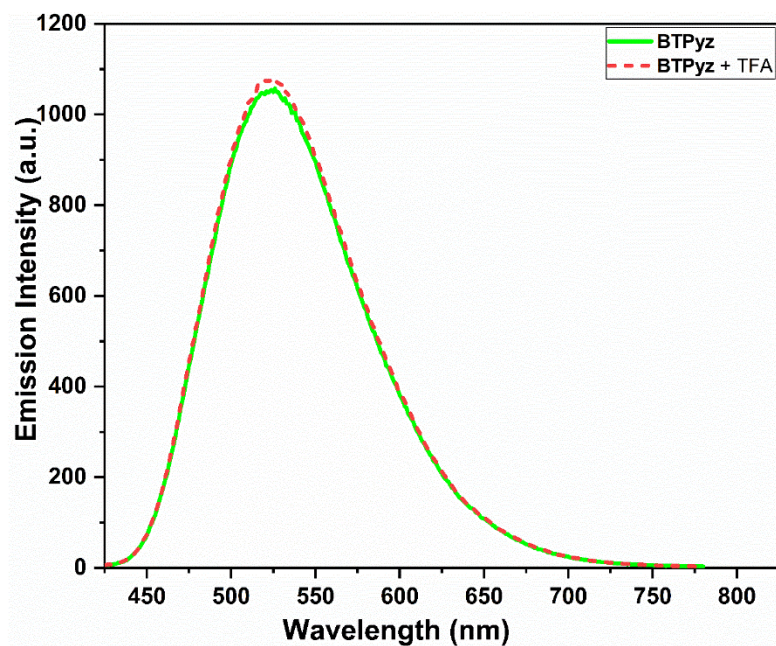

Fig. S16 Fluorescence spectra of **BTPyz** and **BTPyz** with TFA

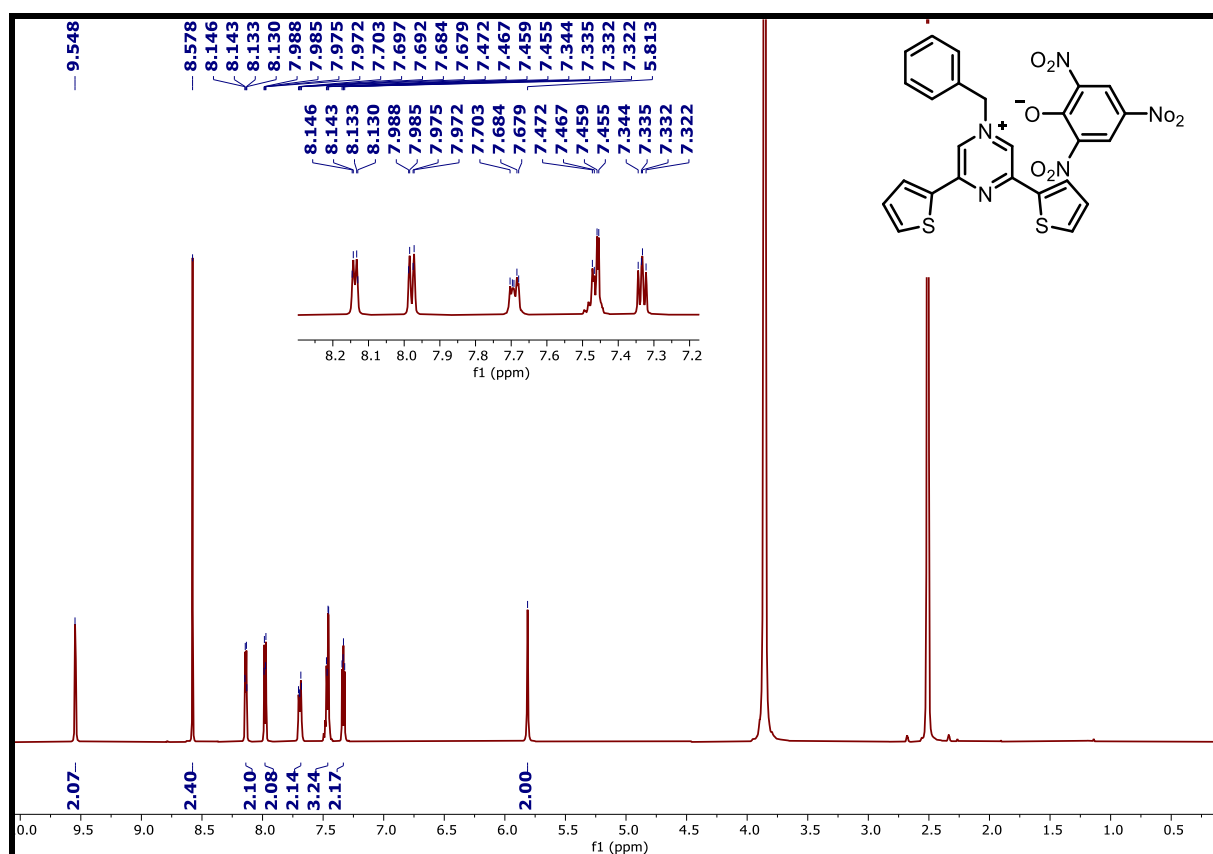

Fig. S17  $^1\text{H}$  NMR of **BTPyz-TNP** complex



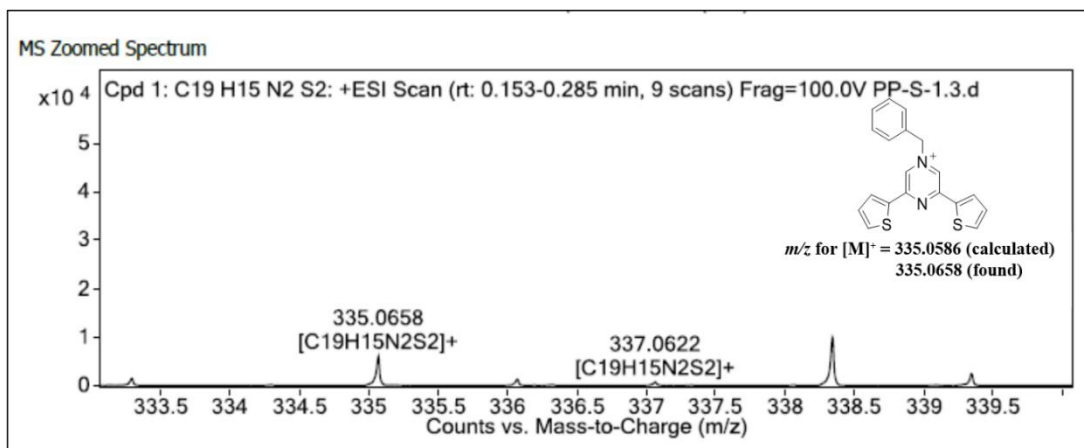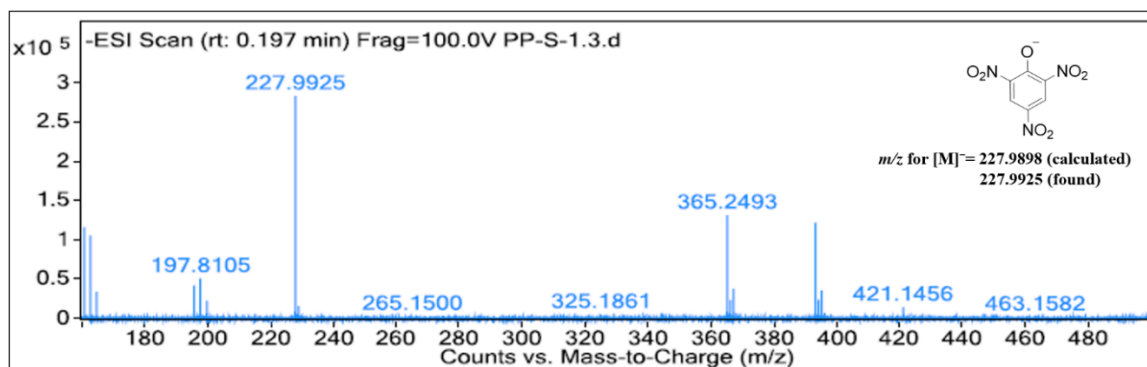

Fig. S18 HRMS of BTPyz-TNP complex

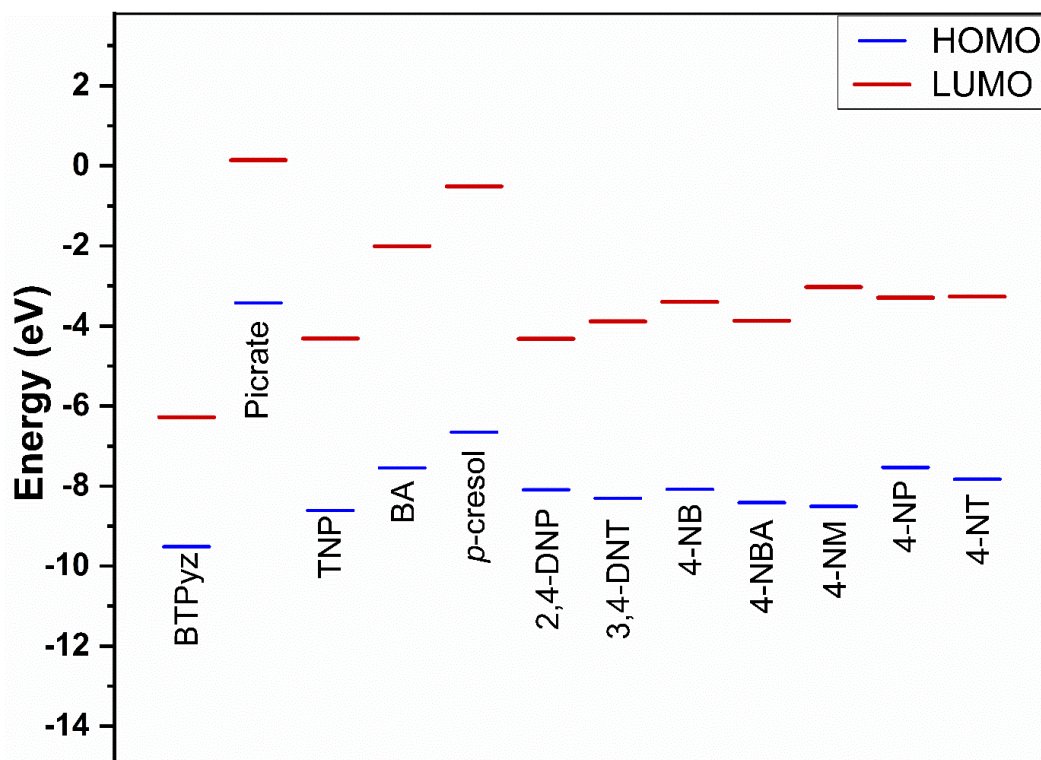

Fig. S19 HOMO-LUMO energy levels of BTPyz and organic analytes

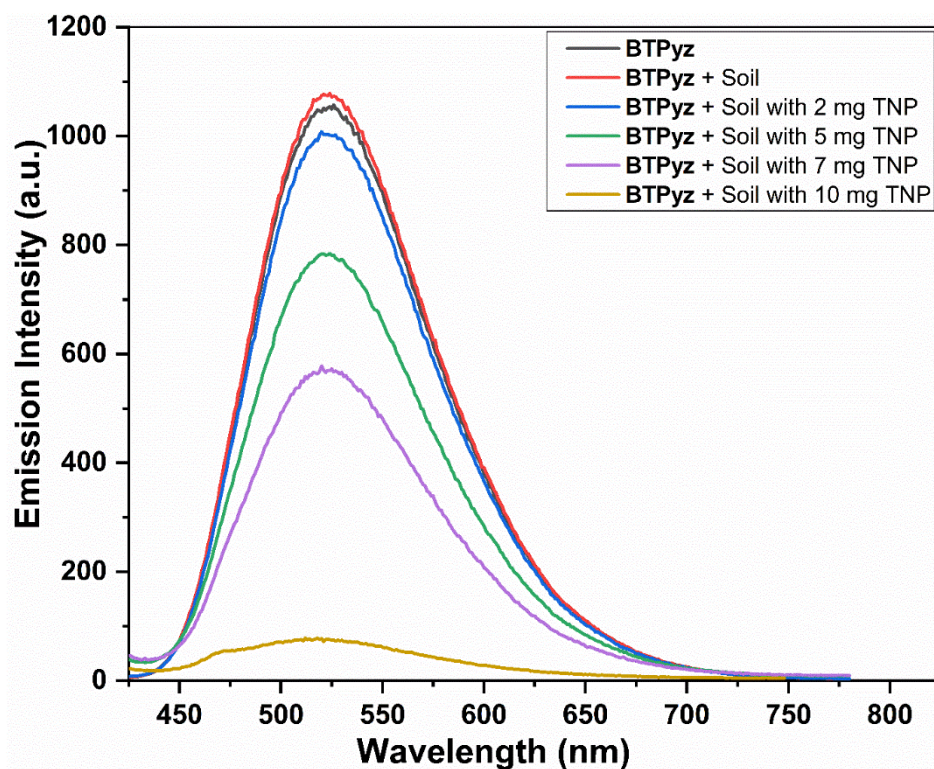

Fig. S20. Fluorescence quenching of TNP in soil samples

Table S3 Single-crystal XRD data and structure refinement of **BTPyz** and **BTPyz-TNP** complex

| Compound          | <b>BTPyz</b>                    | <b>BTPyz-TNP</b> complex |
|-------------------|---------------------------------|--------------------------|
| Empirical formula | $C_{19.5}H_{17}BrN_2O_{0.5}S_2$ | $C_{25}H_{17}N_5O_7S_2$  |
| Formula weight    | 431.38                          | 563.55                   |
| Temperature/K     | 293(2)                          | 93(2)                    |
| Crystal system    | Monoclinic                      | monoclinic               |
| Space group       | $P2_1/n$                        | $C2/c$                   |
| $a/\text{\AA}$    | 13.6130(2)                      | 18.0779(3)               |
| $b/\text{\AA}$    | 18.6032(2)                      | 20.0433(3)               |
| $c/\text{\AA}$    | 15.0166(2)                      | 14.3377(3)               |
| $\alpha/^\circ$   | 90                              | 90                       |
| $\beta/^\circ$    | 90.2640(10)                     | 111.423(2)               |

|                                               |                                                               |                                                               |
|-----------------------------------------------|---------------------------------------------------------------|---------------------------------------------------------------|
| $\gamma/^\circ$                               | 90                                                            | 90                                                            |
| Volume/ $\text{\AA}^3$                        | 3802.84(9)                                                    | 4836.20(16)                                                   |
| Z                                             | 8                                                             | 8                                                             |
| $\rho_{\text{calc}}/\text{g}/\text{cm}^3$     | 1.507                                                         | 1.548                                                         |
| $\mu/\text{mm}^{-1}$                          | 5.049                                                         | 2.513                                                         |
| F(000)                                        | 1752.0                                                        | 2320.0                                                        |
| Crystal size/ $\text{mm}^3$                   | $0.1 \times 0.1 \times 0.08$                                  | $0.15 \times 0.1 \times 0.04$                                 |
| Radiation                                     | Cu K $\alpha$ ( $\lambda = 1.54184$ )                         | Cu K $\alpha$ ( $\lambda = 1.54184$ )                         |
| $2\Theta$ range for data collection/ $^\circ$ | 7.566 to 159.874                                              | 8.094 to 159.676                                              |
| Index ranges                                  | $-14 \leq h \leq 17, -23 \leq k \leq 22, -16 \leq l \leq 19$  | $-21 \leq h \leq 23, -25 \leq k \leq 24, -17 \leq l \leq 18$  |
| Reflections collected                         | 15315                                                         | 14206                                                         |
| Independent reflections                       | 7340 [ $R_{\text{int}} = 0.0249, R_{\text{sigma}} = 0.0296$ ] | 5121 [ $R_{\text{int}} = 0.0327, R_{\text{sigma}} = 0.0347$ ] |
| Data/restraints/parameters                    | 7340/0/453                                                    | 5121/0/352                                                    |
| Goodness-of-fit on $F^2$                      | 1.104                                                         | 1.093                                                         |
| Final R indexes [ $I \geq 2\sigma(I)$ ]       | $R_1 = 0.0487, wR_2 = 0.1321$                                 | $R_1 = 0.0473, wR_2 = 0.1418$                                 |
| Final R indexes [all data]                    | $R_1 = 0.0504, wR_2 = 0.1333$                                 | $R_1 = 0.0504, wR_2 = 0.1451$                                 |
| Largest diff. peak/hole / $e \text{\AA}^{-3}$ | 1.48/-0.93                                                    | 0.44/-0.34                                                    |
| CCDC No.                                      | 2110747                                                       | 2168277                                                       |

**Table S4** Bond Lengths of **BTPyz**

| Atom | Atom | Length/ $\text{\AA}$ | Atom | Atom | Length/ $\text{\AA}$ |
|------|------|----------------------|------|------|----------------------|
| S1   | C5   | 1.726(3)             | C14  | C15  | 1.390(5)             |
| S1   | C8   | 1.707(4)             | C14  | C13  | 1.504(5)             |
| S101 | C105 | 1.727(4)             | C14  | C19  | 1.388(5)             |



|      |      |          |      |      |          |
|------|------|----------|------|------|----------|
| S101 | C108 | 1.706(4) | C104 | C103 | 1.395(5) |
| S2   | C9   | 1.721(3) | C104 | C109 | 1.453(5) |
| S2   | C12  | 1.705(4) | C15  | C16  | 1.394(5) |
| S102 | C109 | 1.720(3) | C114 | C113 | 1.512(5) |
| S102 | C112 | 1.701(4) | C114 | C00X | 1.392(5) |
| N1   | C1   | 1.344(4) | C114 | C115 | 1.389(5) |
| N1   | C4   | 1.342(4) | C105 | C106 | 1.386(5) |
| N2   | C2   | 1.340(4) | C6   | C7   | 1.425(5) |
| N2   | C3   | 1.338(4) | C16  | C17  | 1.381(6) |
| N2   | C13  | 1.492(4) | C109 | C110 | 1.391(5) |
| N101 | C101 | 1.343(5) | C106 | C107 | 1.428(5) |
| N101 | C104 | 1.341(5) | C110 | C111 | 1.421(5) |
| N102 | C102 | 1.337(5) | C00X | C118 | 1.397(5) |
| N102 | C113 | 1.501(4) | C11  | C12  | 1.355(5) |
| N102 | C103 | 1.338(4) | C19  | C18  | 1.389(6) |
| C1   | C5   | 1.453(5) | C116 | C115 | 1.405(6) |
| C1   | C2   | 1.392(4) | C116 | C117 | 1.376(6) |
| C101 | C102 | 1.404(4) | O1   | C20  | 1.463(9) |
| C101 | C105 | 1.450(5) | C17  | C18  | 1.390(6) |
| C4   | C3   | 1.394(4) | C7   | C8   | 1.358(6) |
| C4   | C9   | 1.443(5) | C111 | C112 | 1.358(5) |
| C5   | C6   | 1.390(5) | C108 | C107 | 1.360(6) |
| C10  | C9   | 1.395(5) | C117 | C118 | 1.381(6) |
| C10  | C11  | 1.417(5) |      |      |          |

---

**Table S5** Bond Angles of **BTPyz**

| Atom | Atom | Atom | Angle/°   | Atom | Atom | Atom | Angle/°  |
|------|------|------|-----------|------|------|------|----------|
| C8   | S1   | C5   | 91.48(17) | C103 | C104 | C109 | 121.1(3) |
| C108 | S101 | C105 | 91.34(18) | N102 | C102 | C101 | 118.4(3) |
| C12  | S2   | C9   | 91.70(17) | C14  | C15  | C16  | 120.2(4) |
| C112 | S102 | C109 | 91.72(18) | C00X | C114 | C113 | 120.1(3) |
| C4   | N1   | C1   | 117.9(3)  | C115 | C114 | C113 | 120.1(3) |
| C2   | N2   | C13  | 119.9(3)  | C115 | C114 | C00X | 119.8(3) |
| C3   | N2   | C2   | 121.6(3)  | C101 | C105 | S101 | 119.4(3) |
| C3   | N2   | C13  | 118.5(3)  | C106 | C105 | S101 | 111.8(3) |
| C104 | N101 | C101 | 118.7(3)  | C106 | C105 | C101 | 128.8(3) |
| C102 | N102 | C113 | 119.4(3)  | N102 | C113 | C114 | 110.9(3) |
| C102 | N102 | C103 | 121.8(3)  | C5   | C6   | C7   | 111.1(3) |
| C103 | N102 | C113 | 118.8(3)  | C17  | C16  | C15  | 119.5(4) |
| N1   | C1   | C5   | 117.6(3)  | N2   | C13  | C14  | 110.4(3) |
| N1   | C1   | C2   | 122.2(3)  | N102 | C103 | C104 | 118.7(3) |
| C2   | C1   | C5   | 120.2(3)  | C104 | C109 | S102 | 119.9(3) |
| N101 | C101 | C102 | 121.1(3)  | C110 | C109 | S102 | 111.4(3) |
| N101 | C101 | C105 | 118.2(3)  | C110 | C109 | C104 | 128.5(3) |
| C102 | C101 | C105 | 120.7(3)  | C105 | C106 | C107 | 111.4(3) |
| N1   | C4   | C3   | 121.4(3)  | C109 | C110 | C111 | 111.4(3) |
| N1   | C4   | C9   | 118.7(3)  | C114 | C00X | C118 | 120.4(4) |
| C3   | C4   | C9   | 119.9(3)  | C12  | C11  | C10  | 113.1(3) |
| C1   | C5   | S1   | 119.8(3)  | C14  | C19  | C18  | 120.2(4) |
| C6   | C5   | S1   | 111.8(2)  | C117 | C116 | C115 | 119.5(4) |

|      |      |      |          |      |      |      |          |
|------|------|------|----------|------|------|------|----------|
| C6   | C5   | C1   | 128.4(3) | C114 | C115 | C116 | 119.8(4) |
| N2   | C2   | C1   | 118.0(3) | C16  | C17  | C18  | 120.8(4) |
| C9   | C10  | C11  | 111.4(3) | C8   | C7   | C6   | 113.2(3) |
| C15  | C14  | C13  | 119.9(3) | C112 | C111 | C110 | 112.8(4) |
| C19  | C14  | C15  | 119.9(3) | C11  | C12  | S2   | 112.5(3) |
| C19  | C14  | C13  | 120.2(3) | C7   | C8   | S1   | 112.5(3) |
| N2   | C3   | C4   | 118.9(3) | C107 | C108 | S101 | 112.9(3) |
| C4   | C9   | S2   | 120.9(2) | C116 | C117 | C118 | 121.5(4) |
| C10  | C9   | S2   | 111.2(3) | C117 | C118 | C00X | 119.0(4) |
| C10  | C9   | C4   | 127.8(3) | C108 | C107 | C106 | 112.6(4) |
| N101 | C104 | C103 | 121.3(3) | C111 | C112 | S102 | 112.7(3) |
| N101 | C104 | C109 | 117.6(3) | C19  | C18  | C17  | 119.4(4) |

**Table S6** Bond Lengths of **BTPyz-TNP** complex

| Atom | Atom | Length/Å   | Atom | Atom | Length/Å |
|------|------|------------|------|------|----------|
| S2   | C9   | 1.7221(18) | C1   | C2   | 1.405(2) |
| S2   | C12  | 1.707(2)   | C1   | C5   | 1.449(3) |
| S1   | C5   | 1.7240(19) | C24  | C23  | 1.398(3) |
| S1   | C8   | 1.696(2)   | C24  | C25  | 1.363(2) |
| O1   | C20  | 1.241(2)   | C6   | C5   | 1.409(3) |
| O5   | N4   | 1.238(2)   | C6   | C7   | 1.416(3) |
| O4   | N4   | 1.229(2)   | C23  | C22  | 1.385(2) |
| N2   | C2   | 1.339(2)   | C10  | C9   | 1.381(3) |
| N2   | C3   | 1.343(2)   | C10  | C11  | 1.415(2) |
| N2   | C13  | 1.502(2)   | C22  | C21  | 1.379(2) |

|    |     |          |     |     |          |
|----|-----|----------|-----|-----|----------|
| N1 | C4  | 1.343(3) | C14 | C19 | 1.388(3) |
| N1 | C1  | 1.337(2) | C14 | C13 | 1.504(2) |
| N4 | C23 | 1.437(2) | C14 | C15 | 1.397(2) |
| O6 | N5  | 1.220(2) | C20 | C25 | 1.453(2) |
| N3 | O3  | 1.206(2) | C20 | C21 | 1.448(3) |
| N3 | O2  | 1.220(2) | C19 | C18 | 1.388(3) |
| N3 | C21 | 1.463(2) | C15 | C16 | 1.388(3) |
| N5 | O7  | 1.204(2) | C18 | C17 | 1.385(3) |
| N5 | C25 | 1.467(3) | C11 | C12 | 1.359(3) |
| C4 | C3  | 1.397(2) | C7  | C8  | 1.364(3) |
| C4 | C9  | 1.453(2) | C16 | C17 | 1.392(3) |

**Table S7** Bond Angles of **BTPyz-TNP** complex

| Atom | Atom | Atom | Angle/°    | Atom | Atom | Atom | Angle/°    |
|------|------|------|------------|------|------|------|------------|
| C12  | S2   | C9   | 91.42(9)   | C21  | C22  | C23  | 120.01(17) |
| C8   | S1   | C5   | 91.27(10)  | C4   | C9   | S2   | 120.14(14) |
| C2   | N2   | C3   | 121.56(15) | C10  | C9   | S2   | 111.62(13) |
| C2   | N2   | C13  | 119.88(15) | C10  | C9   | C4   | 128.24(17) |
| C3   | N2   | C13  | 118.56(16) | C19  | C14  | C13  | 120.43(16) |
| C1   | N1   | C4   | 118.97(15) | C19  | C14  | C15  | 119.58(17) |
| O5   | N4   | C23  | 118.13(16) | C15  | C14  | C13  | 119.96(17) |
| O4   | N4   | O5   | 122.57(16) | O1   | C20  | C25  | 121.06(18) |
| O4   | N4   | C23  | 119.28(16) | O1   | C20  | C21  | 127.49(18) |
| O3   | N3   | O2   | 122.32(18) | C21  | C20  | C25  | 111.43(15) |

|     |     |     |            |     |     |     |            |
|-----|-----|-----|------------|-----|-----|-----|------------|
| O3  | N3  | C21 | 118.95(17) | C1  | C5  | S1  | 118.97(14) |
| O2  | N3  | C21 | 118.73(18) | C6  | C5  | S1  | 111.91(14) |
| O6  | N5  | C25 | 117.60(17) | C6  | C5  | C1  | 129.10(17) |
| O7  | N5  | O6  | 123.81(19) | C24 | C25 | N5  | 117.89(17) |
| O7  | N5  | C25 | 118.58(18) | C24 | C25 | C20 | 126.22(18) |
| N1  | C4  | C3  | 121.16(16) | C20 | C25 | N5  | 115.86(16) |
| N1  | C4  | C9  | 118.20(16) | C22 | C21 | N3  | 116.34(17) |
| C3  | C4  | C9  | 120.64(17) | C22 | C21 | C20 | 123.34(16) |
| N1  | C1  | C2  | 121.17(17) | C20 | C21 | N3  | 120.32(16) |
| N1  | C1  | C5  | 117.97(16) | C18 | C19 | C14 | 120.51(17) |
| C2  | C1  | C5  | 120.85(16) | N2  | C13 | C14 | 110.28(14) |
| C25 | C24 | C23 | 117.35(17) | C16 | C15 | C14 | 119.84(18) |
| C5  | C6  | C7  | 110.43(17) | C17 | C18 | C19 | 119.90(19) |
| C24 | C23 | N4  | 118.75(16) | C12 | C11 | C10 | 112.92(18) |
| C22 | C23 | N4  | 119.72(16) | C8  | C7  | C6  | 113.16(18) |
| C22 | C23 | C24 | 121.36(16) | C15 | C16 | C17 | 120.16(18) |
| C9  | C10 | C11 | 111.70(17) | C11 | C12 | S2  | 112.34(14) |
| N2  | C2  | C1  | 118.47(16) | C18 | C17 | C16 | 120.00(18) |
| N2  | C3  | C4  | 118.64(17) | C7  | C8  | S1  | 113.23(17) |

---

## References

- 1 D. Prabha, D. Singh, P. Kumar and R. Gupta, *Inorg. Chem.*, 2021, **60**, 17889–17899.
- 2 N. Tripathi, P. Singh and S. Kumar, *New J. Chem.*, 2017, **41**, 8739–8747.
- 3 S. Hussain, A. H. Malik, M. A. Afroz and P. K. Iyer, *Chem. Commun.*, 2015, **51**, 7207–7210.
